# Supplementary material for: A synergetic effect of light and anion: near-infrared colorimetric monitoring of nitric oxide (NO) release from fluoride/cyanide anions and a water responsive ruthenium nitrosyl complex
Source: Royal Society of Chemistry journal article supplement (doi:10.1039/d4dt02576h), 2024-01-01
Supplement: d4dt02576h1.pdf [file d4dt02576h1.pdf]

## Supporting Information

### **A synergetic effect of light and anion: Near-infrared colorimetric monitoring of nitric oxide (NO) release from fluoride/cyanide anions and water responsive ruthenium nitrosyl complex**

Nancy Sharma<sup>a</sup>, Nitin<sup>a</sup>, Srushti Gadiyaram<sup>a</sup>, Amrita Ghosh<sup>a</sup> and D. Amilan Jose<sup>a\*</sup>

<sup>a</sup>Department of Chemistry, National Institute of Technology (NIT) Kurukshetra, Kurukshetra  
-136119, Haryana, INDIA  
Email: [amilanjosenit@nitkkr.ac.in](mailto:amilanjosenit@nitkkr.ac.in)

#### Table of Contents

| S.No. | Contents                                                               | Page No. |
|-------|------------------------------------------------------------------------|----------|
| 1.    | HR-MS spectrum of <b>1.Ru-OH</b>                                       | SI-2     |
| 2.    | <sup>1</sup> H-NMR spectrum of <b>1.Ru-OH</b> in DMSO-d <sub>6</sub> . | SI-2     |
| 3.    | FT-IR spectrum of <b>1.Ru-OH</b> .                                     | SI-3     |
| 4.    | <sup>31</sup> P-NMR spectrum of <b>1.Ru-OH</b>                         | SI-3     |

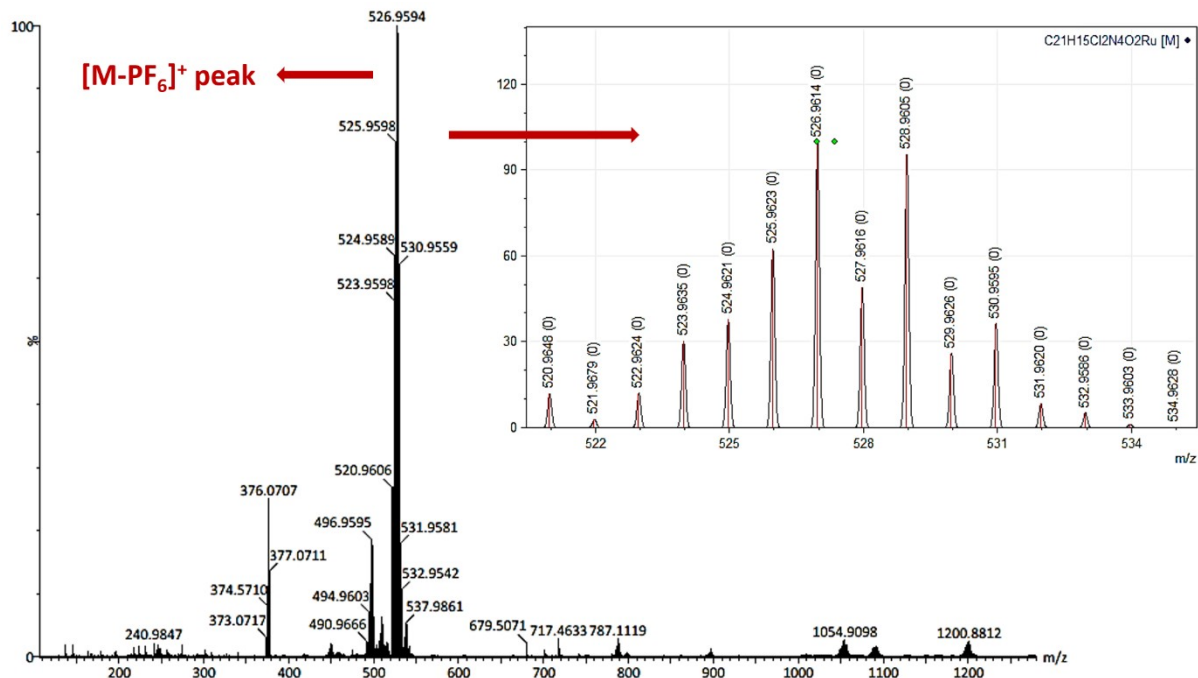

**Figure S1:** The HR-MS spectrum of **1.Ru-OH** (Inset: Theoretical mass isotopic pattern)

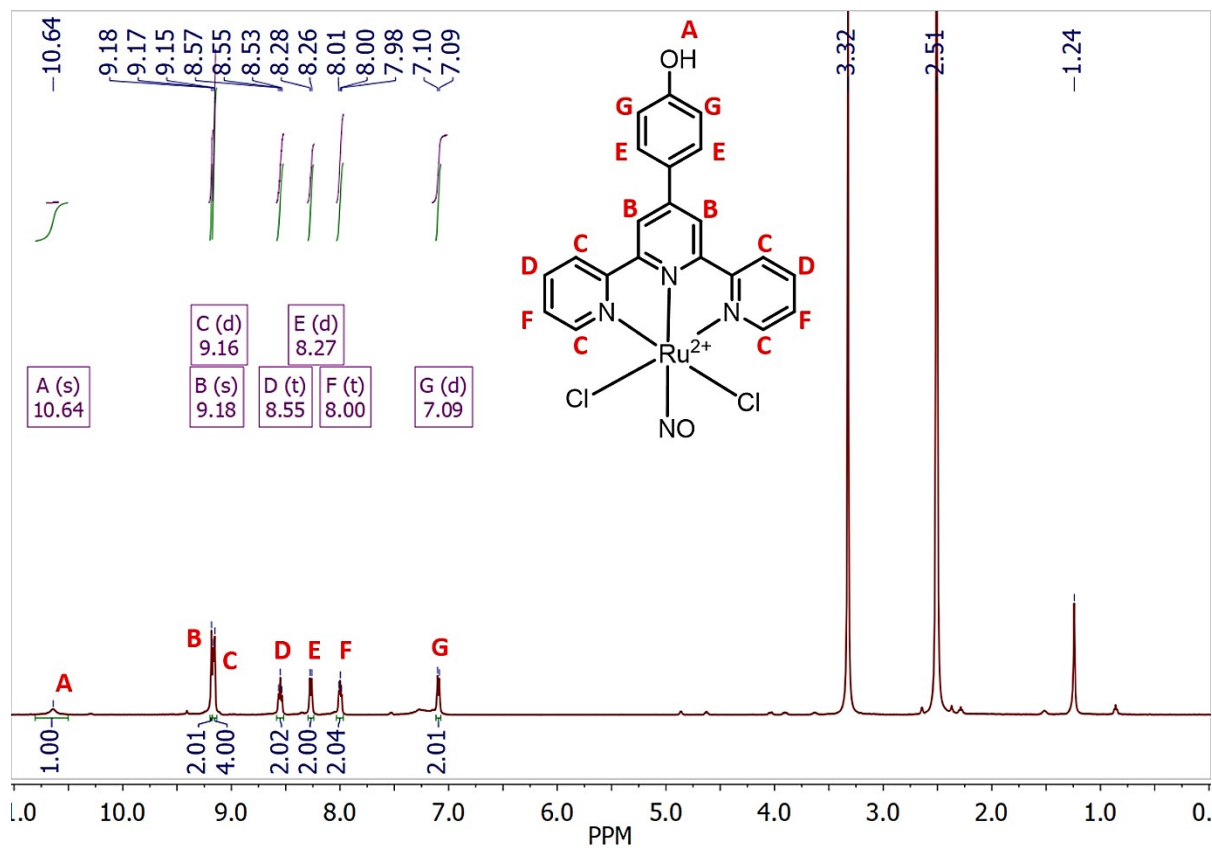

**Figure S2:** The  $^1H$ -NMR spectrum of **1.Ru-OH** in  $DMSO-d_6$ .

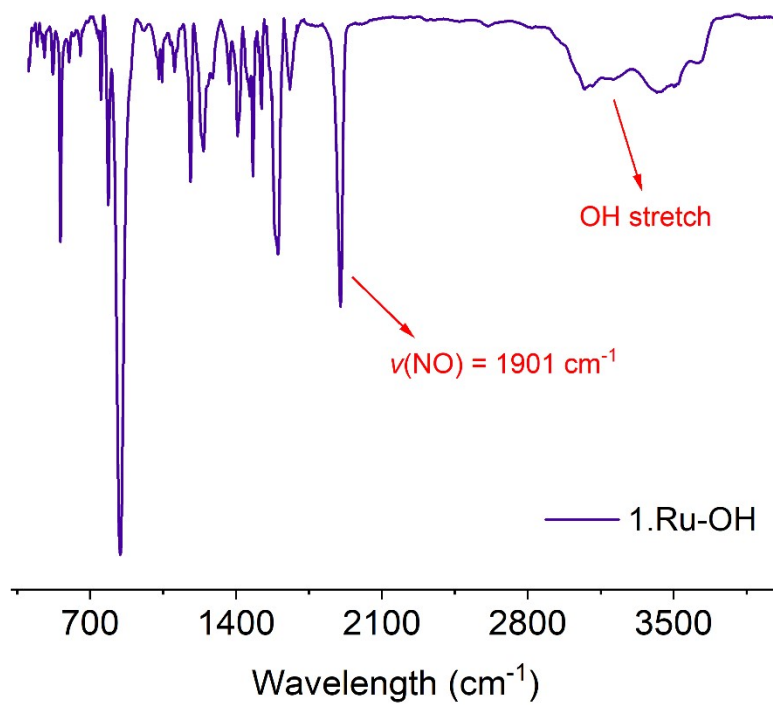

**Figure S3:** The FT-IR spectrum of **1.Ru-OH**.

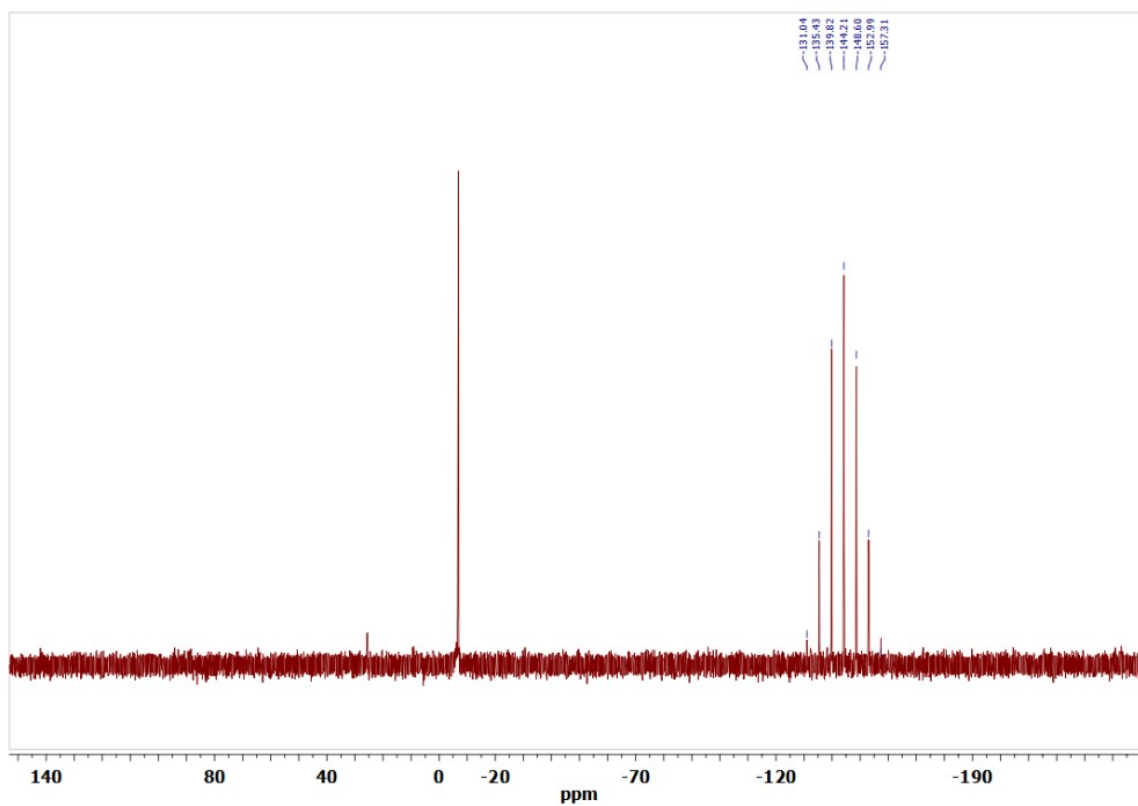

**Figure S4:** The <sup>31</sup>P-NMR spectrum of **1.Ru-OH** in DMSO-d<sub>6</sub>.
